# Supplementary material for: Temperature dependence of denitrification microbial communities and functional genes in an expanded granular sludge bed reactor treating nitrate-rich wastewater
Source: Royal Society of Chemistry journal article supplement (doi:10.1039/c8ra08256a), 2018-01-01
Supplement: c8ra08256a1.pdf [file c8ra08256a1.pdf]

## Supplementary Material for

### Temperature dependence of denitrification microbial communities and functional genes in an expanded granular sludge bed reactor treating nitrate-rich wastewater

Runhua Liao<sup>1,3</sup>, Yu Miao<sup>2</sup>, Jun Li<sup>2</sup>, Yan Li<sup>\*2</sup>, Zhu Wang<sup>2</sup>, Jie Du<sup>1</sup>, Yueming Li<sup>1</sup>,  
Aimin Li<sup>2</sup>, Huijuan Shen<sup>1</sup>

<sup>1</sup>School of Materials Science and Engineering, Jingdezhen Ceramic Institute, Jingdezhen 333403, China

<sup>2</sup>State Key Laboratory of Pollution Control and Resource Reuse, School of the Environment, Nanjing University, Nanjing 210023, China

<sup>3</sup>Department of Mechanical & Nuclear Engineering, Virginia Commonwealth University, Richmond, VA 23219, USA

**\*Corresponding author:** Yan Li

Tel.: +86 025 89680377.

E-mail address: liyan\_0921@126.com (Y. Li).

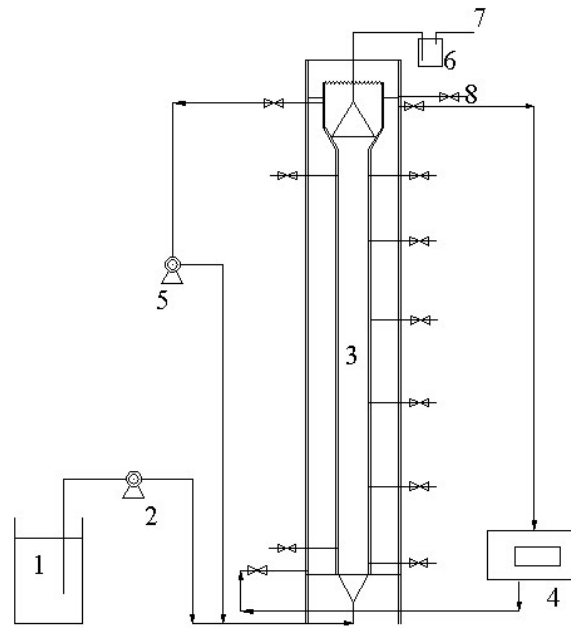

**Fig. S1.** Experimental apparatus and process flow chart of the EGSB reactor operated at  $35\pm 1^\circ\text{C}$ , in which: (1) Influent tank; (2) Influent pump; (3) EGSB reactor (4) Water bath temperature control system; (5) Recycling pump; (6) gas sampler; (7) wet gas meter; (8) effluent water;

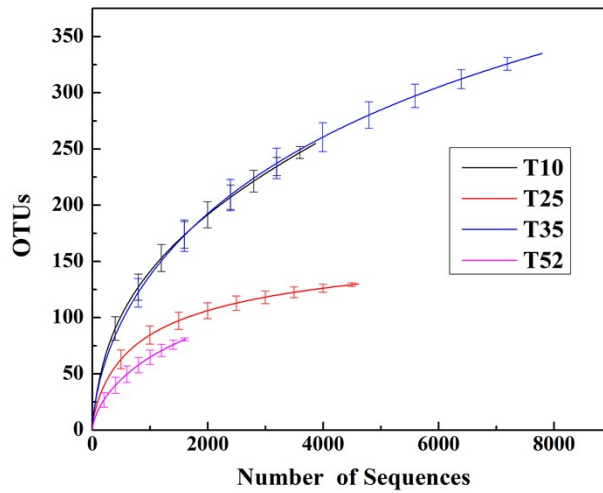

**Fig. S2.** Rarefaction curves for the T10, T25, T35, and T52 samples at a similarity of 97%. The rarefaction curves, which plot the number of observed OTUs as a function of the number of sequences, were computed using the RDP Pyrosequencing Pipeline Rarefaction tool. The error bars show 95% confidence intervals. The samples were arranged in descending order of their OTUs.

**Table S1** Sample T10, T25, T35 and T52 in the genus level of the classification

| <b>genus(T35)</b>          | <b>sequences</b> | <b>%</b> | <b>genus(T10)</b>                   | <b>sequences</b> | <b>%</b> |
|----------------------------|------------------|----------|-------------------------------------|------------------|----------|
| <i>Halomonas</i>           | 3243             | 41.62    | <i>Halomonas</i>                    | 3159             | 81.59    |
| <i>Azoarcus</i>            | 2270             | 29.13    | <i>Pseudomonas</i>                  | 178              | 4.60     |
| <i>Pseudomonas</i>         | 201              | 2.58     | <i>Marinobacter</i>                 | 112              | 2.89     |
| <i>Wandonia</i>            | 190              | 2.44     | <i>Azoarcus</i>                     | 101              | 2.61     |
| <i>Marinobacter</i>        | 67               | 0.86     | <i>Wandonia</i>                     | 73               | 1.89     |
| <i>Acetoanaerobium</i>     | 62               | 0.80     | <i>Proteiniacasticum</i>            | 33               | 0.85     |
| <i>Desulfonatratrum</i>    | 51               | 0.65     | <i>Psychrobacter</i>                | 28               | 0.72     |
| <i>Methyloversatilis</i>   | 50               | 0.64     | <i>Idiomarina</i>                   | 26               | 0.67     |
| <i>Paracoccus</i>          | 48               | 0.62     | <i>Pseudidiomarina</i>              | 12               | 0.31     |
| <i>Castellaniella</i>      | 47               | 0.60     | <i>Corynebacterium</i>              | 8                | 0.21     |
| <i>Proteiniacasticum</i>   | 47               | 0.60     | <i>Alkaliphilus</i>                 | 8                | 0.21     |
| <i>Alkaliphilus</i>        | 42               | 0.54     | <i>Natronincola</i>                 | 5                | 0.13     |
| <i>Zymobacter</i>          | 37               | 0.47     | <i>Alkalibacterium</i>              | 5                | 0.13     |
| <i>Idiomarina</i>          | 33               | 0.42     | <i>Anoxynatronum</i>                | 4                | 0.10     |
| <i>Clostridium IV</i>      | 26               | 0.33     | <i>Acetoanaerobium</i>              | 4                | 0.10     |
| <i>Thauera</i>             | 23               | 0.30     | <i>Paracoccus</i>                   | 3                | 0.08     |
| <i>Anoxynatronum</i>       | 21               | 0.27     | <i>Stappia</i>                      | 3                | 0.08     |
| <i>Garciella</i>           | 19               | 0.24     | <i>Selenihalanaerobacter</i>        | 2                | 0.05     |
| <i>Labrenzia</i>           | 16               | 0.21     | <i>Erysipelothrix</i>               | 2                | 0.05     |
| <i>Tindallia</i>           | 16               | 0.21     | <i>Nitriliruptor</i>                | 1                | 0.03     |
| <i>Natronincola</i>        | 15               | 0.19     | <i>Dietzia</i>                      | 1                | 0.03     |
| <i>Alishewanella</i>       | 14               | 0.18     | <i>Alkaliflexus</i>                 | 1                | 0.03     |
| <i>Anaerovorax</i>         | 14               | 0.18     | <i>Petrimonas</i>                   | 1                | 0.03     |
| <i>Acinetobacter</i>       | 12               | 0.15     | <i>Phyllobacterium</i>              | 1                | 0.03     |
| <i>Gordonia</i>            | 11               | 0.14     | <i>Pseudaminobacter</i>             | 1                | 0.03     |
| <i>Alkaliflexus</i>        | 9                | 0.12     | <i>Chelativorans</i>                | 1                | 0.03     |
| <i>Erysipelothrix</i>      | 9                | 0.12     | <i>Devosia</i>                      | 1                | 0.03     |
| <i>Corynebacterium</i>     | 7                | 0.09     | <i>Rhodobaca</i>                    | 1                | 0.03     |
| <i>Desulfitispora</i>      | 7                | 0.09     | <i>Alkalilimnicola</i>              | 1                | 0.03     |
| <i>Brucella</i>            | 6                | 0.08     | <i>Legionella</i>                   | 1                | 0.03     |
| <i>Truepera</i>            | 6                | 0.08     | <i>Alishewanella</i>                | 1                | 0.03     |
| <i>Acholeplasma</i>        | 6                | 0.08     | <i>Methylophaga</i>                 | 1                | 0.03     |
| <i>Exiguobacterium</i>     | 5                | 0.06     | <i>Anaerovorax</i>                  | 1                | 0.03     |
| <i>Desulfuromonas</i>      | 4                | 0.05     | <i>Anaerobranca</i>                 | 1                | 0.03     |
| <i>Azomonas</i>            | 4                | 0.05     | <i>Clostridium IV</i>               | 1                | 0.03     |
| <i>Pelospira</i>           | 4                | 0.05     | <i>Saccharofermentans</i>           | 1                | 0.03     |
| <i>Pannonibacter</i>       | 3                | 0.04     | <i>Sporolactobacillaceae_incert</i> | 1                | 0.03     |
| <i>Pseudidiomarina</i>     | 3                | 0.04     | <i>Haloplasma</i>                   | 1                | 0.03     |
| <i>Saccharofermentans</i>  | 3                | 0.04     | <i>unclassified genus</i>           | 87               | 2.25     |
| <i>Haloactinobacterium</i> | 2                | 0.03     | <b>genus(T25)</b>                   | <b>sequences</b> | <b>%</b> |
| <i>Devosia</i>             | 2                | 0.03     | <i>Halomonas</i>                    | 2106             | 45.68    |
| <i>Aidingimonas</i>        | 2                | 0.03     | <i>Azoarcus</i>                     | 1128             | 24.47    |
| <i>Desulfitibacter</i>     | 2                | 0.03     | <i>Pseudomonas</i>                  | 424              | 9.20     |
| <i>Clostridium III</i>     | 2                | 0.03     | <i>Wandonia</i>                     | 96               | 2.08     |
| <i>Rhodococcus</i>         | 1                | 0.01     | <i>Marinobacter</i>                 | 50               | 1.08     |
| <i>Dietzia</i>             | 1                | 0.01     | <i>Proteiniacasticum</i>            | 40               | 0.87     |
| <i>Proteiniphilum</i>      | 1                | 0.01     | <i>Paracoccus</i>                   | 39               | 0.85     |
| <i>Flavobacterium</i>      | 1                | 0.01     | <i>Alkaliphilus</i>                 | 36               | 0.78     |
| <i>Variovorax</i>          | 1                | 0.01     | <i>Acetoanaerobium</i>              | 30               | 0.65     |
| <i>Ochrobactrum</i>        | 1                | 0.01     | <i>Desulfonatratrum</i>             | 25               | 0.54     |
| <i>Albidovulum</i>         | 1                | 0.01     | <i>Acinetobacter</i>                | 24               | 0.52     |
| <i>Rhodobaca</i>           | 1                | 0.01     | <i>Idiomarina</i>                   | 24               | 0.52     |
| <i>Serpens</i>             | 1                | 0.01     | <i>Alkaliflexus</i>                 | 18               | 0.39     |
| <i>Azorhizophilus</i>      | 1                | 0.01     | <i>Gordonia</i>                     | 16               | 0.35     |
| <i>Aeromonas</i>           | 1                | 0.01     | <i>Anoxynatronum</i>                | 15               | 0.33     |
| <i>Dethiobacter</i>        | 1                | 0.01     | <i>Clostridium IV</i>               | 15               | 0.33     |
| <i>Anaerotruncus</i>       | 1                | 0.01     | <i>Corynebacterium</i>              | 14               | 0.30     |
| <i>Clostridium XI</i>      | 1                | 0.01     | <i>Labrenzia</i>                    | 14               | 0.30     |
| <i>Bacillus</i>            | 1                | 0.01     | <i>Alishewanella</i>                | 14               | 0.30     |

| <i>unclassified genus</i>    | 1116             | 14.32    | <i>Aminobacterium</i>              | 14  | 0.30 |
|------------------------------|------------------|----------|------------------------------------|-----|------|
| <b>genus(T52)</b>            | <b>sequences</b> | <b>%</b> | <i>Natronincola</i>                | 13  | 0.28 |
| <i>Halomonas</i>             | 1244             | 76.89    | <i>Castellaniella</i>              | 12  | 0.26 |
| <i>Azoarcus</i>              | 135              | 8.34     | <i>Desulfuromonas</i>              | 11  | 0.24 |
| <i>Pseudomonas</i>           | 43               | 2.66     | <i>Thauera</i>                     | 11  | 0.24 |
| <i>Wandonia</i>              | 29               | 1.79     | <i>Tindallia</i>                   | 9   | 0.20 |
| <i>Idiomarina</i>            | 27               | 1.67     | <i>Erysipelothrix</i>              | 8   | 0.17 |
| <i>Psychrobacter</i>         | 12               | 0.74     | <i>Rhodococcus</i>                 | 7   | 0.15 |
| <i>Marinobacter</i>          | 11               | 0.68     | <i>Azomonas</i>                    | 7   | 0.15 |
| <i>Anoxynatronum</i>         | 11               | 0.68     | <i>Desulfitispora</i>              | 7   | 0.15 |
| <i>Natronincola</i>          | 10               | 0.62     | <i>Zymobacter</i>                  | 6   | 0.13 |
| <i>Alkaliphilus</i>          | 10               | 0.62     | <i>Flavobacterium</i>              | 4   | 0.09 |
| <i>Acetoanaerobium</i>       | 6                | 0.37     | <i>Anaerovorax</i>                 | 4   | 0.09 |
| <i>Proteinclasticum</i>      | 5                | 0.31     | <i>Exiguobacterium</i>             | 4   | 0.09 |
| <i>Corynebacterium</i>       | 4                | 0.25     | <i>Acholeplasma</i>                | 4   | 0.09 |
| <i>Pseudidiomarina</i>       | 4                | 0.25     | <i>Bruceella</i>                   | 3   | 0.07 |
| <i>Alishewanella</i>         | 4                | 0.25     | <i>Ochrobactrum</i>                | 3   | 0.07 |
| <i>Desulfonatronum</i>       | 2                | 0.12     | <i>Desulfitibacter</i>             | 3   | 0.07 |
| <i>Pseudaminobacter</i>      | 2                | 0.12     | <i>Garciella</i>                   | 3   | 0.07 |
| <i>Paracoccus</i>            | 2                | 0.12     | <i>Dendrosporobacter</i>           | 3   | 0.07 |
| <i>Desulfitispora</i>        | 2                | 0.12     | <i>Indibacter</i>                  | 2   | 0.04 |
| <i>Haloplasma</i>            | 2                | 0.12     | <i>Rhodobaca</i>                   | 2   | 0.04 |
| <i>Dietzia</i>               | 1                | 0.06     | <i>Pseudidiomarina</i>             | 2   | 0.04 |
| <i>Alkaliflexus</i>          | 1                | 0.06     | <i>Clostridium XI</i>              | 2   | 0.04 |
| <i>Nitratireductor</i>       | 1                | 0.06     | <i>Truepera</i>                    | 2   | 0.04 |
| <i>Rhodobaca</i>             | 1                | 0.06     | <i>Haloactinobacterium</i>         | 1   | 0.02 |
| <i>Clostridium XI</i>        | 1                | 0.06     | <i>Chelativorans</i>               | 1   | 0.02 |
| <i>Selenihalanaerobacter</i> | 1                | 0.06     | <i>Devosia</i>                     | 1   | 0.02 |
| <i>Alkalibacterium</i>       | 1                | 0.06     | <i>Roseibium</i>                   | 1   | 0.02 |
| <i>Truepera</i>              | 1                | 0.06     | <i>Anaerobranca</i>                | 1   | 0.02 |
| <i>Aminobacterium</i>        | 1                | 0.06     | <i>Pelospora</i>                   | 1   | 0.02 |
| <i>unclassified genus</i>    | 44               | 2.72     | <i>Acetanaerobacterium</i>         | 1   | 0.02 |
|                              |                  |          | <i>Ethanoligenens</i>              | 1   | 0.02 |
|                              |                  |          | <i>Sporolactobacillaceae_incet</i> | 1   | 0.02 |
|                              |                  |          | <i>Halolactibacillus</i>           | 1   | 0.02 |
|                              |                  |          | <i>Planomicrobium</i>              | 1   | 0.02 |
|                              |                  |          | <i>Aminomonas</i>                  | 1   | 0.02 |
|                              |                  |          | <i>unclassified genus</i>          | 324 | 7.03 |

**Table S2** P values of nitrate removal of T10, T25, T35 and T52

| Samples | P        |
|---------|----------|
| T35-T52 | 0.287399 |
| T35-T15 | 6.49E-06 |
| T35-T10 | 5.96E-08 |
| T35-T25 | 8.91E-07 |
| T25-T10 | 5.3E-08  |
| T25-T52 | 0.015201 |
| T25-T15 | 0.7643   |
| T15-T10 | 5.28E-08 |
| T15-T52 | 0.014387 |
| T10-T52 | 6.63E-08 |
